# Supplementary material
Source: PubMed Central journal article supplement (PMC3696543)
Supplement: JCI66398sd.pdf [file JCI66398sd.pdf]

## SUPPLEMENTAL TABLES

**Supplemental Table 1. Effect of EPI-001 stereoisomers on AR promoters**

| Compound | IC <sub>50</sub> (uM) | PSA-Luc activity (%) | PB-Luc activity (%) | ARR3-Luc activity (%) |
|----------|-----------------------|----------------------|---------------------|-----------------------|
|          | mean±SD               | mean±SD              | mean±SD             | mean±SD               |
| EPI-001  | 12.63±4.33            | 36.91±16.46          | 63.96±13.70         | 59.56±12.58           |
| EPI-002  | 7.40±1.46 *           | 24.33±13.63          | 41.58±6.63          | 61.00±23.48           |
| EPI-003  | 17.08±3.49            | 33.55±11.31          | 54.72±7.83          | 66.74±22.07           |
| EPI-004  | 13.78±0.66            | 45.16±29.13          | 66.44±12.47         | 55.93±22.06           |
| EPI-005  | 10.95±4.79            | 24.49±13.20          | 43.70±9.98          | 37.75±10.60           |

\*EPI-002 vs EPI-003  $P=0.00571$ ; and EPI-002 vs EPI-004  $P=0.00116$ . Ratio Student's 2- tailed  $t$  test.

**Supplemental Table 2. Effect of EPI-001 stereoisomers on proliferation of LNCaP cells**

| Compound     | G0/G1 (%)<br>mean $\pm$ SD | S (%)<br>mean $\pm$ SD | G2/M (%)<br>mean $\pm$ SD |
|--------------|----------------------------|------------------------|---------------------------|
| DMSO         | 61.85 $\pm$ 1.98           | 21.65 $\pm$ 0.70       | 16.09 $\pm$ 1.37          |
| EPI-001      | 75.94 $\pm$ 2.55           | 9.85 $\pm$ 2.91        | 13.75 $\pm$ 0.29          |
| EPI-002      | 74.44 $\pm$ 6.74           | 11.72 $\pm$ 0.43       | 15.06 $\pm$ 4.18          |
| EPI-003      | 76.76 $\pm$ 7.78           | 9.16 $\pm$ 4.17        | 13.73 $\pm$ 3.67          |
| EPI-004      | 74.09 $\pm$ 8.24           | 10.48 $\pm$ 3.66       | 16.43 $\pm$ 2.37          |
| EPI-005      | 74.81 $\pm$ 5.89           | 11.82 $\pm$ 3.84       | 12.98 $\pm$ 2.03          |
| Bicalutamide | 77.86 $\pm$ 3.46           | 9.72 $\pm$ 2.11        | 12.04 $\pm$ 1.28          |

n=3 separate experiments

**Supplemental Table 3. IC<sub>50</sub> values of EPI analogs/probes (PSA-Luc reporter)**

| <b>Analogue</b>         | <b>IC<sub>50</sub> (uM) mean ± SD</b> |
|-------------------------|---------------------------------------|
| BADGE.2H <sub>2</sub> O | 74.92 ± 10.41                         |
| EPI-046                 | 3.16 ± 1.91                           |
| EPI-047                 | 4.10 ± 2.67                           |
| EPI-051                 | 12.60 ± 3.98                          |
| EPI-052                 | 7.82 ± 1.11                           |
| EPI-053                 | 6.70 ± 0.44                           |
| EPI-054                 | 6.50 ± 0.76                           |
| EPI-055                 | 4.17 ± 2.03                           |
| EPI-063                 | 19.94 ± 2.66                          |
| EPI-064                 | 7.42 ± 2.62                           |

n≥3 separate experiments

**Supplemental Table 4. Pharmacokinetic parameters of EPI-001**

| PK parameters      | Units   | i.v. (50mg/kg)   | Oral (100mg/kg)  |
|--------------------|---------|------------------|------------------|
|                    |         | mean $\pm$ SD    | mean $\pm$ SD    |
| AUC <sub>INF</sub> | Hr*mg/L | 33.65 $\pm$ 5.15 | 57.71 $\pm$ 7.53 |
| C <sub>max</sub>   | mg/L    | 24.25 $\pm$ 3.79 | 11.93 $\pm$ 2.75 |
| Clearance (CL)     | L/hr/kg | 1.51 $\pm$ 0.23  | -                |
| Cl/F               | L/hr/kg | -                | 1.75 $\pm$ 0.23  |
| Half Life          | hr      | 3.52 $\pm$ 1.95  | 3.27 $\pm$ 0.16  |
| Vd                 | L/kg    | 7.23 $\pm$ 3.03  | -                |
| Vd/F               | L/kg    | -                | 8.22 $\pm$ 0.68  |

\* Non-compartmental analysis using WinNonline, (Pharsight Corporation); linear trapezoidal method used. C<sub>max</sub>, peak concentration; Vd, volume of distribution; AUC, area under the plasma concentration-time curve.

## Supplemental Figure 1

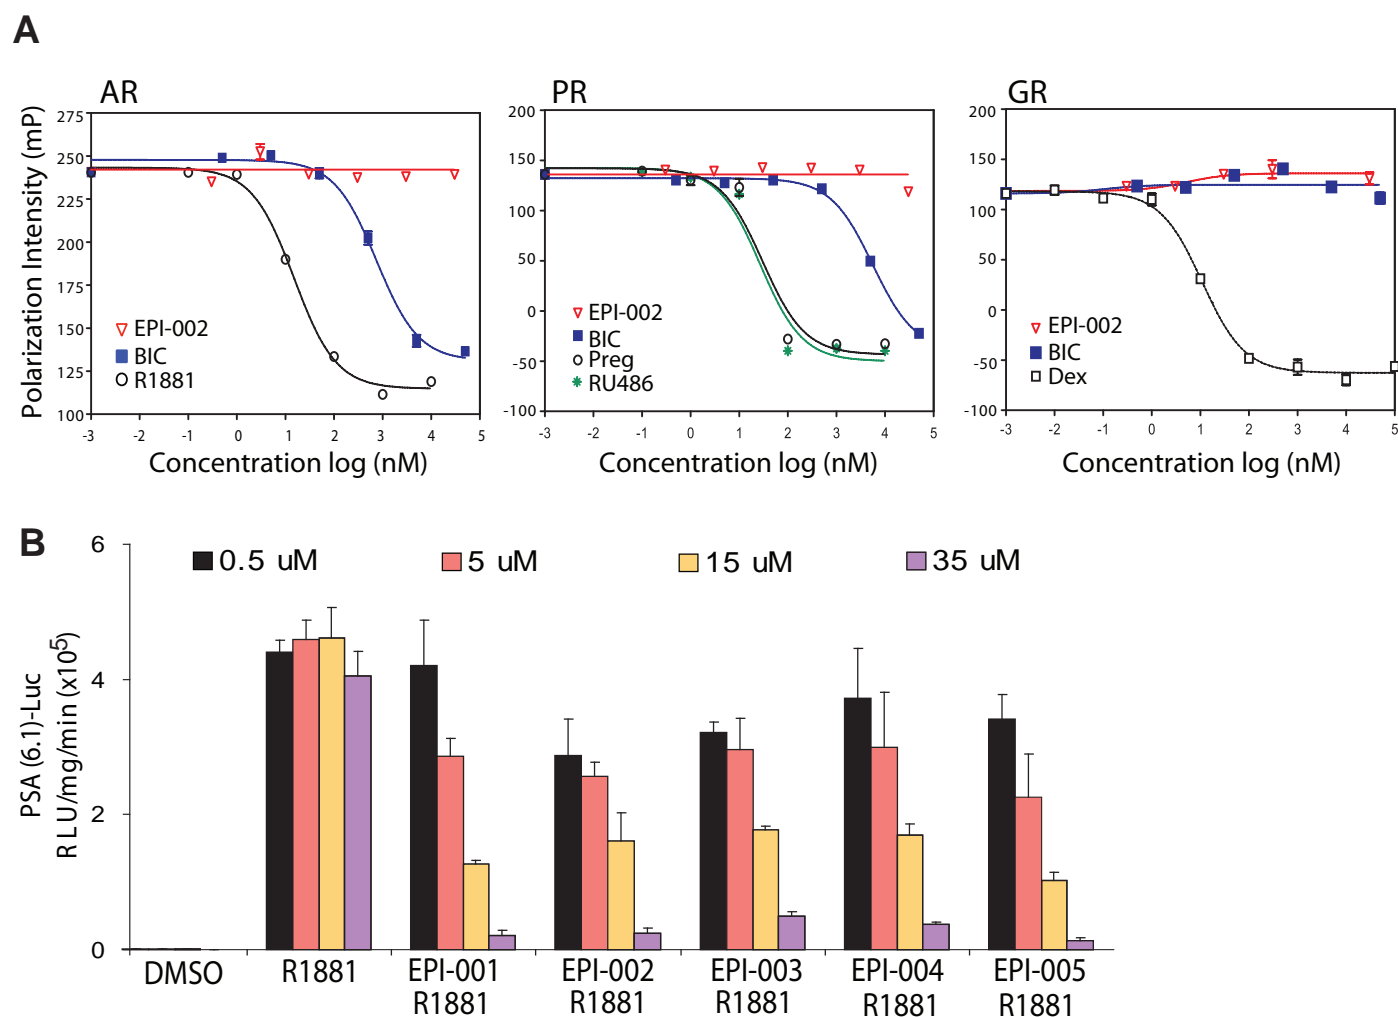

**Supplemental Figure 1 (A)** Competitive ligand binding curve showing the displacement of 1nM fluorescently labeled ligand from recombinant LBDs of AR, PR and GR by R1881, BIC, 4-pregnene-3,20 dione (Preg), RU486, dexamethasone (Dex), or EPI-002 using fluorescent polarization (mP) with excitation at 470 nm and emission wavelength at 535 nm. Serial dilution was performed for each test compound. Data represents the mean  $\pm$  SEM. **(B)** Dose-dependent response to EPI stereoisomers on PSA-luciferase activity in LNCaP cells treated with R1881 (1nM) and the indicated concentrations of EPI stereoisomers for 48 hours. Bars represent mean  $\pm$  SD.

## Supplemental Figure 2

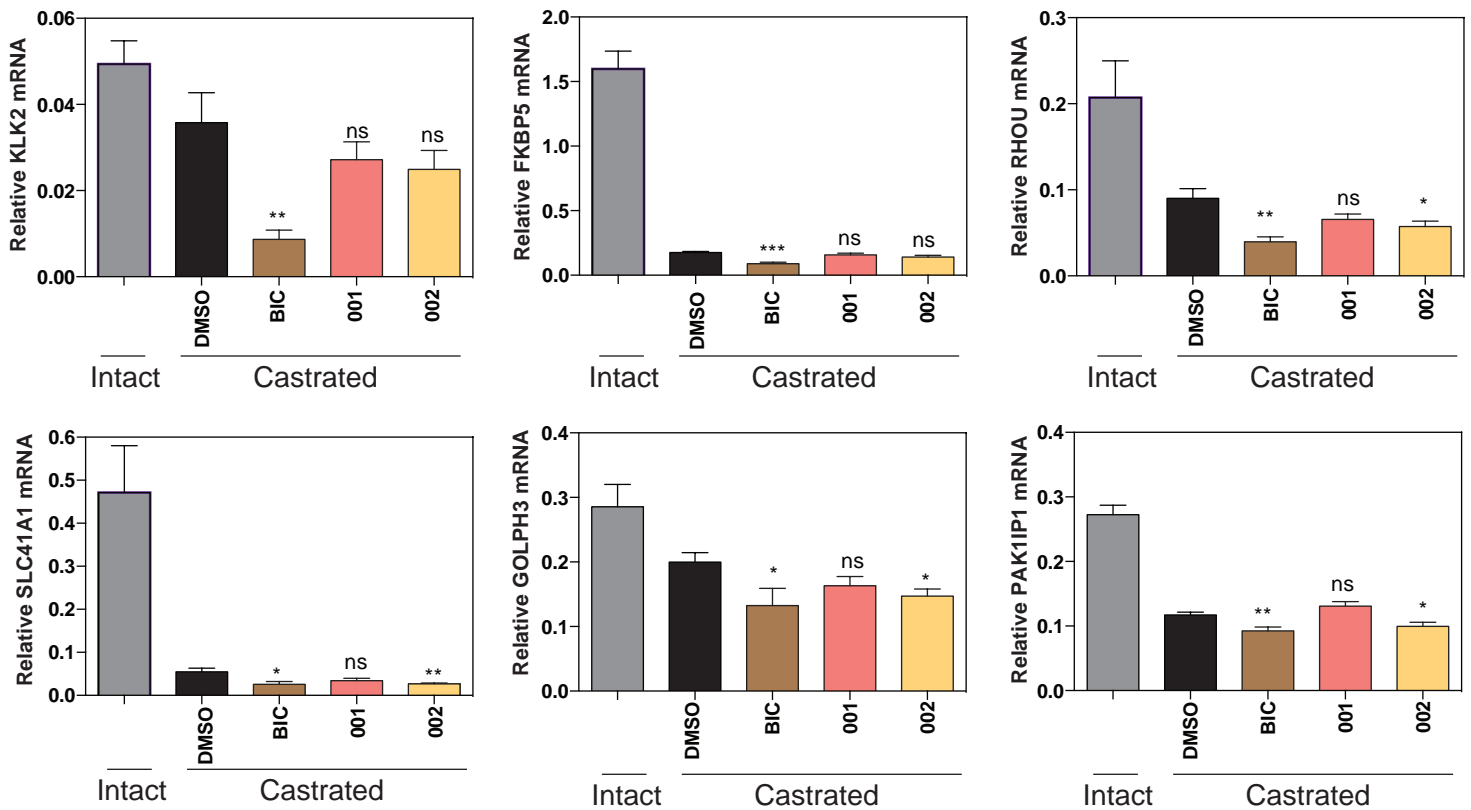

**Supplemental Figure 2** Transcript levels of androgen-regulated genes expressed in LNCaP xenografts from castrated hosts employed in Figure 2E to 2H. Non-castrated controls are included (intact, n = 3). Levels of transcript of each gene were measured by qRT-PCR and normalized to *RPL13A*. Student's *t* test was performed to compare drug-treated groups to DMSO-treated in castrated mice. Bars represent the mean  $\pm$  SEM. Student's 2-tailed *t* test (\* $P < 0.05$ ; \*\* $P < 0.01$ ; \*\*\* $P < 0.001$ ) ns= not significant.

### Supplemental Figure 3

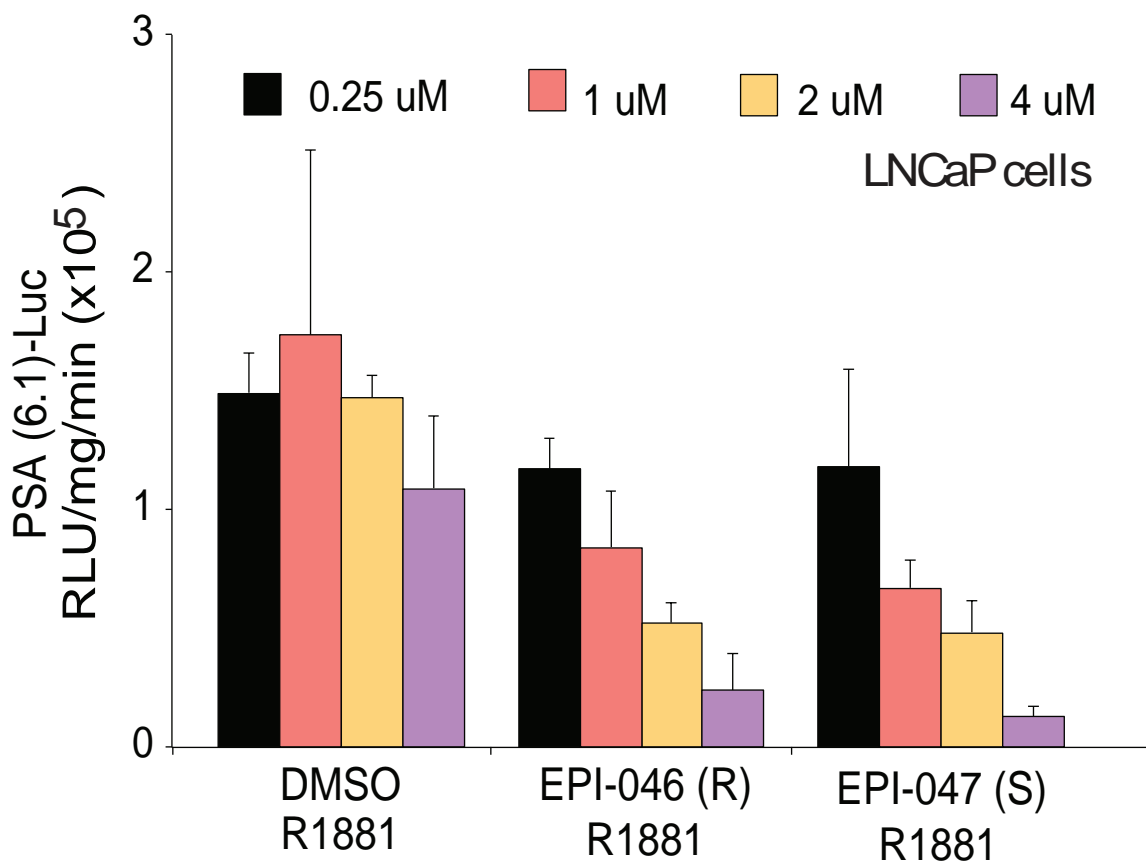

**Supplemental Figure 3** Inhibition of AR transcriptional activity by modified stereoisomers of EPI-001 analogues used in Click reactions. LNCaP cells transfected with PSA (6.1kb)-luciferase reporter were treated with increasing concentrations of each probe for 1 hour, before the addition of R1881 (1nM) for an additional 48 hours. Data represent the mean  $\pm$  SD.

## Supplemental Figure 4

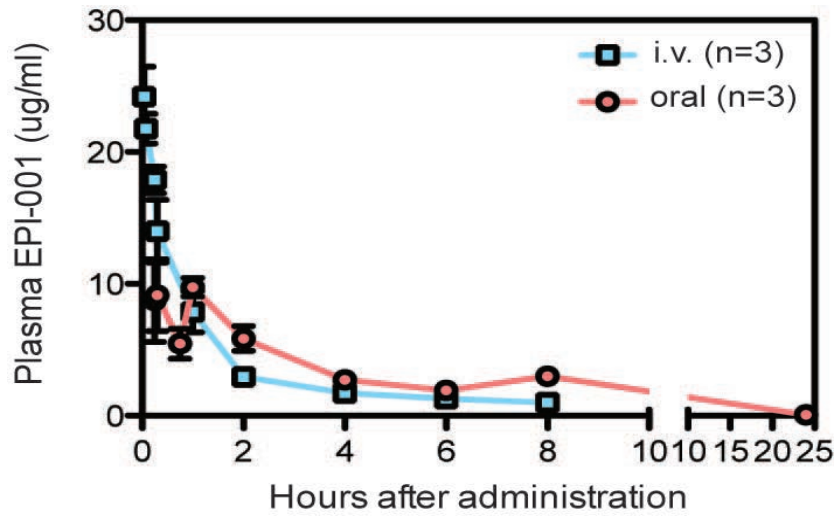

**Supplemental Figure 4** Pharmacokinetics of EPI-001. Plasma concentrations of EPI-001 after a single intravenous dose of 50 mg/kg body weight or oral dose of 100 mg/kg body weight. Values represent the mean  $\pm$  SEM from 3 mice.



## Supplemental Figure 5

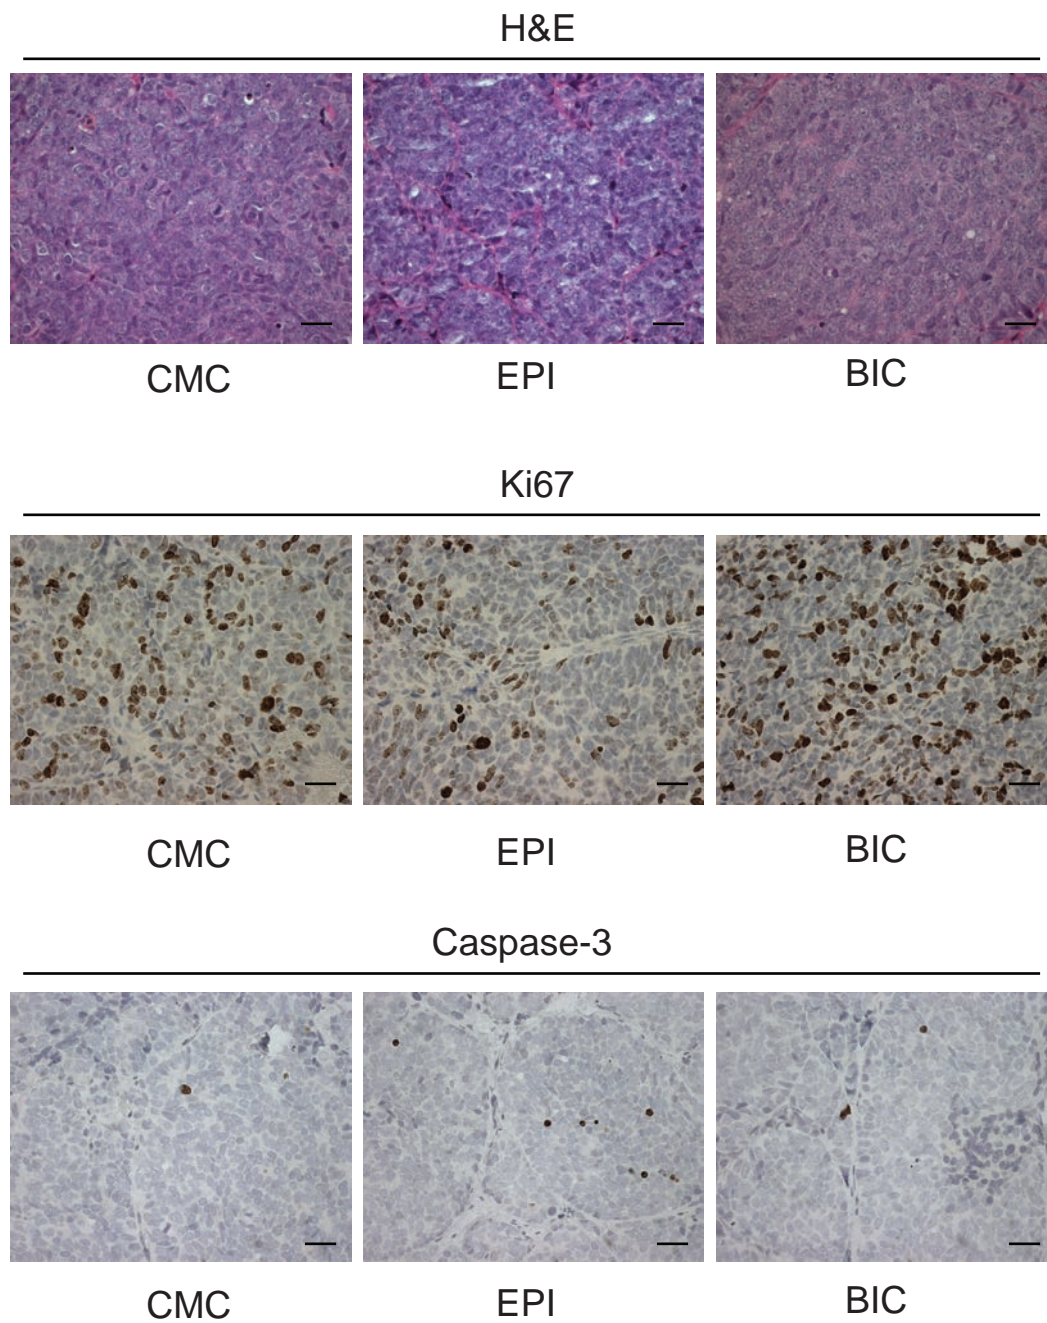

**Supplemental Figure 5** Immunohistochemistry of representative sections of VCaP xenografts harvested at the duration of the experiment and stained for hematoxylin and eosin (H&E), Ki67 and caspase-3. Black bars = 20  $\mu$ m.
